# Supplementary material for: DNA-Modified Liquid Crystal Droplets
Source: MDPI journal article supplement (doi:10.3390/bios12050275), 2022-04-27
Supplement: s1 [file s1]

## Article

# DNA-Modified Liquid Crystal Droplets

Xiuxiu Yang <sup>1</sup>, Xiao Liang <sup>1</sup>, Rajib Nandi <sup>1</sup>, Yi Tian <sup>1</sup>, Yiyang Zhang <sup>1</sup>, Yan Li <sup>1</sup>, Jingsheng Zhou <sup>1</sup>, Yuanchen Dong <sup>1</sup>, Dongsheng Liu <sup>1</sup>, Zhengwei Zhong <sup>2,\*</sup> and Zhongqiang Yang <sup>1,\*</sup>

- <sup>1</sup> Key Laboratory of Organic Optoelectronics and Molecular Engineering of the Ministry of Education, Department of Chemistry, Tsinghua University, Beijing 100084, China; yxx17@mails.tsinghua.edu.cn (X.Y.); liangxiao@tsinghua.edu.cn (X.L.); rajibnandi1987@gmail.com (R.N.); crystal\_yi\_work@163.com (Y.T.); yiyang.zhang@jiahua-china.com (Y.Z.); li\_yan850603@163.com (Y.L.); zhoujingsheng@petrochina.com.cn (J.Z.); dongyc@iccas.ac.cn (Y.D.); liudongsheng@mail.tsinghua.edu.cn (D.L.)
- <sup>2</sup> Department of Chemical Engineering, Hebei Petroleum University of Technology, Chengde 067000, China
- \* Correspondence: zhongzhengwei@cdpc.edu.cn (Z.Z.); zyang@tsinghua.edu.cn (Z.Y.)

**Table S1.** Details of the DNA sequences utilized in this paper.

| Name                       | Detailed sequence information                                                  |
|----------------------------|--------------------------------------------------------------------------------|
| R1                         | 5'-TCTATTCGCATGAGAATTCCATTACCG-TAAGTACACATCTACTTCACCA-3'                       |
| R2                         | 5'-CTTACGGTGAATGGAATTCTCATGCGAATAGATA-CACATCTACTTCACCA-3'                      |
| DNA-C18                    | C <sub>18</sub> H <sub>37</sub> (PO <sub>3</sub> H)-5'- TGGTGAAGTAGATGTGTA -3' |
| S1                         | 5'-CCTGTCTGCCTAATGTGCGTCGTAAG TACACATCTACTTCACCA-3'                            |
| S2                         | 5'-CTTACGACGCACAAGGAGATCATGAGCTGTCATCGGTCA -3'                                 |
| S3                         | 5'-CTCATGATCTCCTTTAGGCAGACAGGGACACACTAAGGT-3'                                  |
| FAM-DNA                    | FAM-5'-TGACCGATGACAG-3'                                                        |
| ROX-DNA                    | ROX-5'-ACCTTAGTGTGTC-3'                                                        |
| Hg <sup>2+</sup> aptamer 1 | 5'-CGCATTTCAGGATTCTCAACTCGTATACACATCTACTTCACCA-3'                              |
| Hg <sup>2+</sup> aptamer 2 | 5'-TTCGTGTTGTTGTTTCTGTTTGCCTACACATCTACTTCACCA-3'                               |
| Thrombin aptamer 1         | 5'-AGTCCGTGGTAGGGCAGGT-GGGGTGACTTACACATCTACTTCACCA-3'                          |
| Thrombin aptamer 2         | 5'-GGTTGGTGTGGTTGGTACACATCTACTTCACCA-3'                                        |
| ATP aptamer1               | 5'-TGGACACCTTCCTTACACATCTACTTCACCA-3'ACCTGTGGAAGGA                             |
| ATP aptamer2               | 5'-ACCTGGGGGAGTATTGCGAGGAAGAAGGTGTCACATA-CACATCTACTTCACCA-3'                   |
| H1                         | 5'-TCTATTCGCATGAGGATCCCATTACCG-TAAGTACACATCTACTTCACCA-3'                       |
| H2                         | 5'-CTTACGGTGAATGGGATCCTCATGCGAATAGATA-CACATCTACTTCACCA-3'                      |
| random 1                   | 5'-TCTATTCGCATGAGAATTGCATTACCGTAAG-3'                                          |
| random 2                   | 5'-CTTACGGTGAATGCAATTGTCATGCGAATAGA-3'                                         |
| C-DNA-SH                   | SH-5'-TACACATCTACTTCACCA-3'                                                    |
| NC-DNA-SH                  | SH-5'-GCTCACTCAGTCTCAACA-3'                                                    |

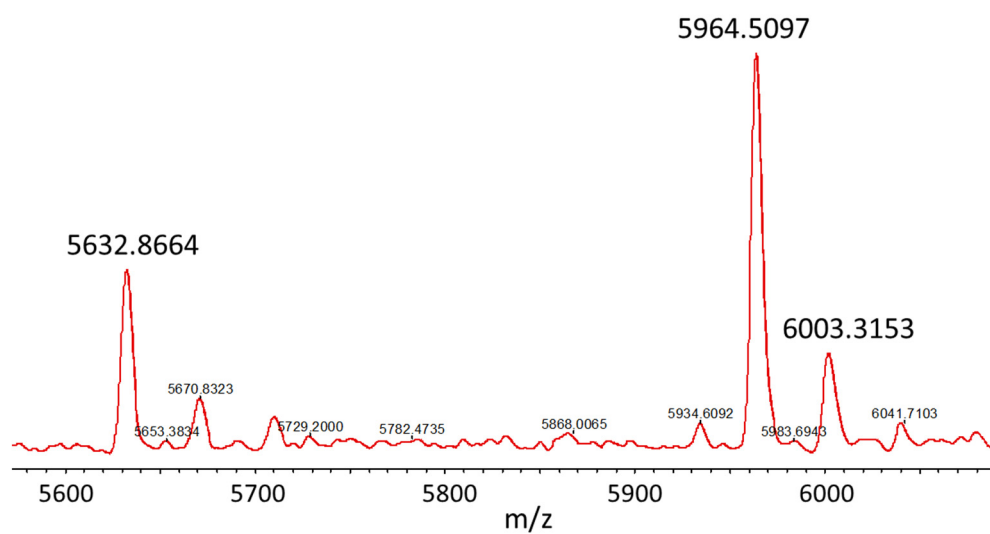

**Figure S1.** The MALDI - TOF mass spectra of DNA-C18.

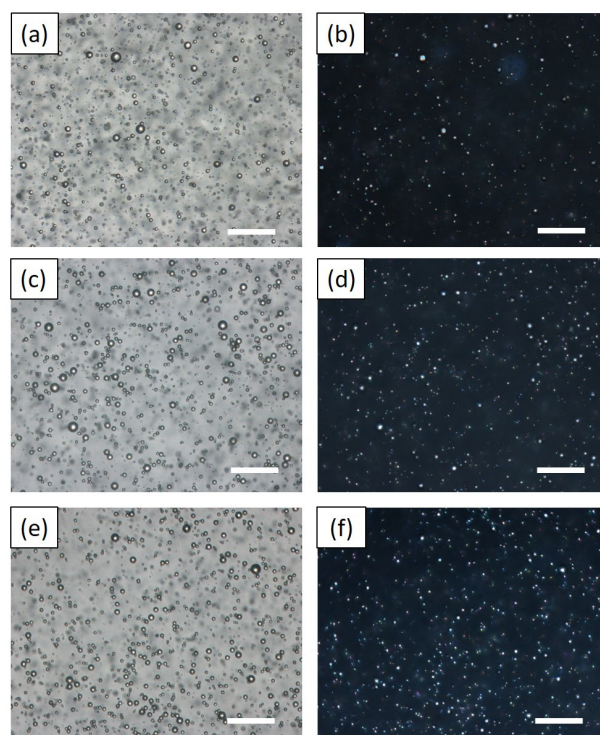

**Figure S2.** Microscopy images of DNA modified LC droplets before (a, b) and after adding (c, d) 20  $\mu\text{M}$  R1, (e, f) 20  $\mu\text{M}$  R2, (a, c, e) bright field, (b, d, f) polarized light images.

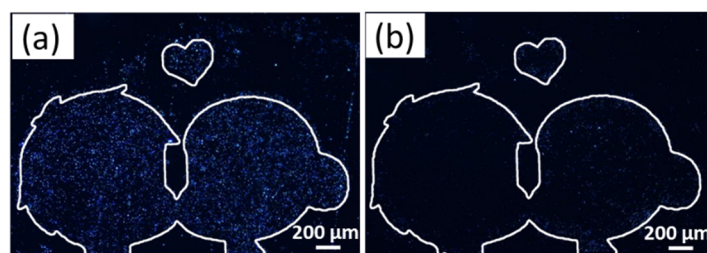

**Figure S3.** The printing pattern forming with LC droplets, which were linked to Au substrate by base complementation pairing rule. (a) LC droplets are linked to Au substrate by complementary DNA-SH, (b) LC droplets cannot be linked to Au substrate by non-complementary DNA-SH.

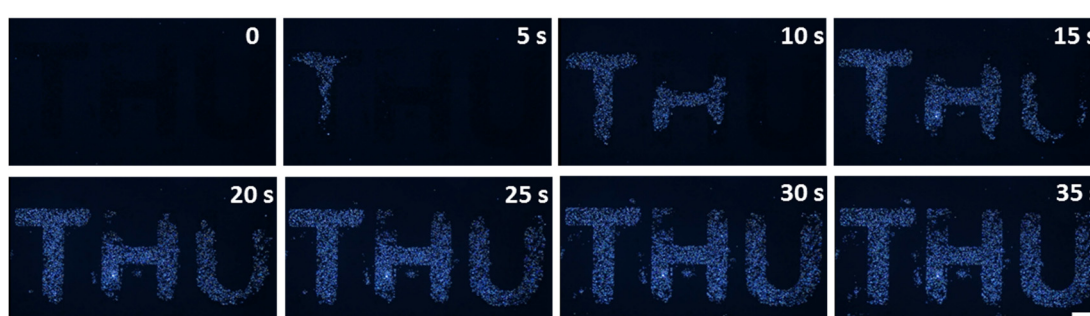

**Figure S4.** Patterned LC droplets were immersed in 40 °C PBS and the pattern change with the temperature decreased.

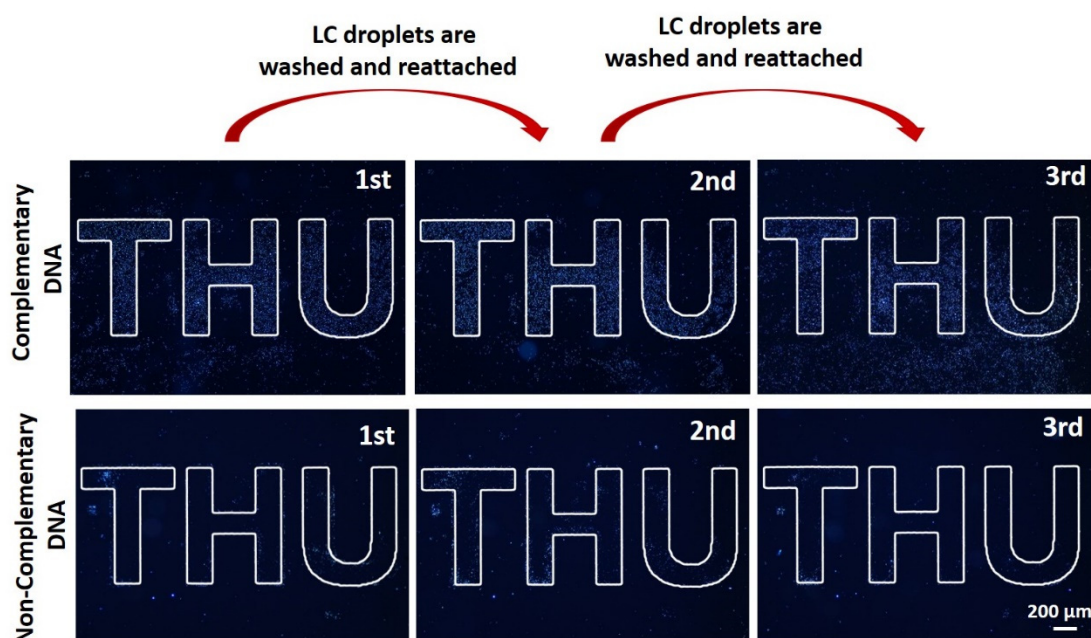

**Figure S5.** The Au substrate modified by C-SH-DNA and NC-DNA-SH after heating and washing which can be utilized to adsorb LC droplets at least 3 times.
